1 Dynamics of human gut microbiota and short-chain fatty acids in response to dietary interventions  
2 with three fermentable fibers

3  
4 Nielson T. Baxter,<sup>a\*</sup> Alexander W. Schmidt,<sup>a</sup> Arvind Venkataraman,<sup>a†</sup> Kwi S. Kim,<sup>a</sup> Clive Waldron,<sup>a</sup>  
5 Thomas M. Schmidt<sup>ab#</sup>

6  
7 <sup>a</sup> Department of Internal Medicine, University of Michigan, Ann Arbor, MI.

8 <sup>b</sup> Department of Ecology and Evolutionary Biology, University of Michigan, Ann Arbor, MI

9  
10 Running Head: Different Responses to Fermentable Fibers

11  
12 #Address correspondence to Thomas M. Schmidt, [schmidt@umich.edu](mailto:schmidt@umich.edu)

13 \*Present address: Nielson T. Baxter, Elanco Animal Health, Greenfield, Indiana

14 †Present address: Arvind Venkataraman, CF Biosciences, The Procter & Gamble Company,  
15 Cincinnati, Ohio

16  
17 Word Counts: Abstract 231; Text 5,463

18 **ABSTRACT**

19 Production of short-chain fatty acids (SCFAs), especially butyrate, in the gut microbiome is  
20 required for optimal health but is frequently limited by the lack of fermentable fiber in the diet.  
21 We attempted to increase butyrate production by supplementing the diets of 174 healthy young  
22 adults for two weeks with resistant starch from potatoes (RPS), resistant starch from maize (RMS),  
23 inulin from chicory root, or an accessible corn starch control. RPS resulted in the greatest increase  
24 in total SCFAs, including butyrate. Although the majority of microbiomes responded to RPS with  
25 increases in the relative abundance of bifidobacteria, those that responded with an increase in  
26 *Ruminococcus bromii* or *Clostridium chartatabidum* were more likely to yield higher butyrate  
27 concentrations, especially when their microbiota were replete with populations of the butyrate-  
28 producing species *Eubacterium rectale*. RMS and inulin induced different changes in fecal  
29 communities, but they did not generate significant increases in fecal butyrate levels.

30

31 **IMPORTANCE** These results reveal that not all fermentable fibers are equally capable of  
32 stimulating SCFA production, and they highlight the importance of the composition of an  
33 individual's microbiota in determining whether or not they respond to a specific dietary  
34 supplement. In particular, *R. bromii* or *C. chartatabidum* may be required for enhanced butyrate  
35 production in response to RS. Bifidobacteria, though proficient at degrading RS and inulin, may not  
36 contribute to the butyrogenic effect of those fermentable fibers in the short term.

## 37 INTRODUCTION

38 Short-chain fatty acids (SCFAs) are major end products of bacterial fermentation in the human  
39 colon and are known to have wide-ranging impacts on host physiology. Butyrate in particular is  
40 important for maintaining health via regulation of the immune system (1), maintenance of the  
41 epithelial barrier (2, 3), and promoting satiety following meals (4). It may be protective against  
42 several diseases, including colorectal cancer (5), inflammatory bowel disease (6), graft-versus-host  
43 disease (7), diabetes (8), and obesity (8, 9). Therefore, stimulating butyrate production by the  
44 colonic microbiome could be useful for sustaining health and treating diseases.

45  
46 One strategy for stimulating butyrate production is to supplement the diet with carbohydrates  
47 that are resistant to degradation by human enzymes but can be metabolized by select bacteria in  
48 the colon. We previously demonstrated that one such resistant starch (RS) prepared from  
49 potatoes (RPS) could increase average fecal butyrate in healthy, young adults (10). Others have  
50 reported increased butyrate in response to inulin in humans and resistant starch from maize (RMS)  
51 in mice (11, 12). A critical challenge to these potential therapies is the variable responses between  
52 individuals, likely influenced by differences in the composition of their gut microbiota. To capture  
53 this variability large numbers of subjects are required. We analyzed samples from 174 university  
54 students who consented to participate in and then successfully completed this short-term  
55 interventional study. This young cohort provided a wide diversity of gut communities without the  
56 additional complications of chronic health conditions such as obesity, Type 2 diabetes or  
57 cardiovascular disease that are related to altered microbiome structure and function (13, 14). We  
58 did not ask the participants to make changes to their diets other than taking the supplements  
59 provided, even though we recognize different diets also have a profound impact on microbiome

60 structure and function. Our objective was to determine how these different resistant  
61 polysaccharides affected the concentrations of SCFAs when added to “normal” diets, not just  
62 under one dietary regimen. With this number of participants we were able to evaluate three  
63 different resistant polysaccharides and an amylase-sensitive polysaccharide as a negative control.

64  
65 Understanding the butyrogenic effect of these supplements and specific gut bacteria is important  
66 for designing more broadly effective therapies and predicting which individuals are likely to  
67 benefit from them. More generally, defining metabolic interactions among gut microbes enhances  
68 our understanding of the assembly, maintenance and outputs from the gut microbiome.

69  
70 Identifying butyrogenic configurations of the microbiome is challenging because several different  
71 bacteria (or combinations of bacteria) may be involved in the multi-step process. Many bacteria in  
72 the colon are involved in the degradation of dietary fiber, the complex mixture of plant  
73 polysaccharides that is not susceptible to host enzymes (15, 16). However, many of these bacteria  
74 are specialists, attacking specific bonds in specific types of polymers (17-19). Only a limited  
75 number of gut bacteria may be able to degrade any given resistant polysaccharide that is used as a  
76 dietary supplement. Primary degraders depolymerize specific polysaccharides to mono-, di- and  
77 oligo-saccharides that they can take-up and ferment themselves to acidic end products such as  
78 acetate or lactate (20). Their selective growth on the dietary supplement should result in a higher  
79 relative abundance in fecal communities. However, most resistant starch degraders are not  
80 among known butyrate producers (19, 21). Thus, for these supplements to stimulate butyrate  
81 production, the activities of additional organisms would be required. These secondary fermenters  
82 capture degradation and fermentation products from primary degraders and metabolize them into

83 new molecules including butyrate (Fig. 1). However, if primary degraders use the supplements  
84 efficiently, only a fraction of the carbon and energy they contain may become available to the  
85 secondary fermenters. Therefore, increases in the relative abundance of butyrate producers may  
86 be more difficult to detect, but their metabolic activity could still be evidenced by an increase in  
87 fecal butyrate.

88  
89 Candidates for performing one or more of the steps in Fig. 1 *in vivo* have already been identified  
90 by their metabolic capabilities *in vitro*. For example, *Ruminococcus bromii* and *Bifidobacterium*  
91 *adolescentis* have been shown to degrade resistant starches (22). There have been claims that  
92 other species degrade resistant starches, but they are less compelling because they either involved  
93 starch preparations that could include sensitive as well as resistant fractions (23) or because the  
94 evidence was indirect (e.g. binding to starch granules (24)) or the presence of DNA sequences  
95 encoding amylase-like GH13 domains (25). The ability to degrade inulin *in vitro* has been  
96 demonstrated for some species of *Bifidobacterium* (though not all strains) (26) and by several  
97 members of the *Lachnospiraceae* and *Ruminococcaceae* families in the phylum Firmicutes (27).  
98 These two families include most of the known butyrate producers (21). The most abundant of  
99 them in the human gut are *Eubacterium rectale* and *Faecalibacterium prausnitzii*, both of which  
100 are capable of degrading inulin and producing butyrate from it (27). *E. rectale* has been shown  
101 incapable of degrading resistant starches unless they are heat-treated to denature some of the  
102 crystal structure (22). Such rigorous tests have not been reported to our knowledge for *F.*  
103 *prausnitzii*. *In vitro* studies have also demonstrated that combinations of primary degraders and  
104 secondary bacteria can produce butyrate from resistant polysaccharides by cross feeding. For  
105 example, *Eubacterium rectale* can grow on degradation products of RS released by *R. bromii*, and

106 several species of *Roseburia* and *F. prausnitzii* have been cross-fed by *Bifidobacterium* spp. (20, 22,  
107 28, 29). Bifidobacteria also promote butyrate production by another select group of bacteria  
108 because they produce both acetate and lactate via a unique fermentation pathway known as the  
109 Bifid shunt (30). This combination of end products can be converted into butyrate by *Eubacterium*  
110 *hallii*, *Anaerostipes caccae* or *Anaerostipes hadrus* (31, 32).

111  
112 These known degraders and butyrate producers were targeted for evaluation in this dietary  
113 intervention. But we also analyzed the entire community of fecal bacteria to identify any  
114 organisms that had not previously been associated with the metabolism of these fermentable  
115 fibers. We attempted to address four major issues:

- 116 1. Do the three resistant polysaccharides stimulate butyrate production in this population of  
117 healthy, young individuals? If so, do they have similar impacts on butyrate production?
- 118 2. Which gut bacteria respond to these dietary additions by increasing in relative abundance?  
119 Can we identify any species that were unexpectedly affected? Are the same bacteria affected  
120 by all three supplements?
- 121 3. Can we find any evidence of selectivity, either in the substrates used by primary degraders or  
122 in the butyrate producers they cross feed?
- 123 4. Do changes in the relative abundance of primary degraders and butyrate producers explain  
124 differences in individuals' butyrate concentrations?

125

## 126 **RESULTS**

### 127 **Effects on Short Chain Fatty Acids**

128 We first examined the impact of each supplement on the concentration of SCFAs in the feces. Both  
129 RPS and inulin significantly increased total SCFA concentrations, by 32% and 12% respectively  
130 (both  $p < 0.001$ ). Supplementation with RPS increased butyrate concentrations by an average of  
131 29% ( $p < 0.001$ ) and acetate by an average of 21% ( $p = 0.0012$ , Table 1). However, the response was  
132 highly variable between individuals: the median concentration of butyrate increased in 63% of  
133 individuals and was either unchanged or decreased in the remaining 37%. Although total SCFA  
134 concentrations increased with inulin supplementation, there were no statistically significant  
135 changes in individual SCFAs. Nor were there significant changes in the concentration of any of the  
136 SCFAs in the groups whose diet was supplemented with either RMS or accessible starch (Table 1).  
137 Furthermore, there were no significant differences in SCFA concentrations between the control  
138 group that consumed 20 g of accessible starch compared to the group that consumed 40 g of  
139 accessible starch.

140

### 141 **Effects on Bacterial Communities**

142 We characterized changes to the gut microbiota using 16S rRNA gene sequencing. We chose not to  
143 cluster sequences into operational taxonomic units (OTUs) after discovering that several taxa of  
144 interest, with very different responses to the dietary supplements, would be clustered into a single  
145 OTU even at 99% identity. For example, *Bifidobacterium longum* and *B. faecale* have varying  
146 abilities to degrade RS, but the V4 region of the 16S rRNA gene in these species is 99.6% identical.  
147 Combining sequences corresponding to these species masks a biological pattern that is readily

148 apparent when considering the unique sequences. Unlike OTUs that are calculated *de novo* with  
149 each new data set, unique sequences also have the benefit of being directly comparable across  
150 datasets. Nevertheless, the small size of the V4 region of *Bifidobacterium* makes it impossible to  
151 resolve all species within this genus. *B. adolescentis*, *B. faecale* and *B. stercoris* have identical V4  
152 regions, as do *B. longum* and *B. breve*. A third group, *B. catenulatum*, *B. pseudocatenulatum*, and  
153 *B. kashiwanohense*, also share identical V4 regions. For all other species of interest a single  
154 sequence was identified that was specific to each species. To avoid analysis of spurious sequences,  
155 we limited our analysis to the 500 most abundant unique sequences, which accounted for 71% of  
156 the approximately 70 million curated sequencing reads. Using this approach we determined that  
157 both the RPS and inulin significantly altered the overall structure of the community (PERMANOVA,  
158  $p=0.001$  and  $p=0.002$ , respectively), while the accessible starch and RMS did not ( $p=1.0$  and  
159  $p=0.65$ , respectively). None of the supplements significantly changed the alpha diversity, as  
160 measured by the inverse Simpson index ( $p>0.05$ ).

161

## 162 **The Most Affected Bacterial Populations**

163 The sequences that changed the most were identified by the ratio of their relative abundance  
164 during supplementation to their relative abundance before (Fig. 2). Most of the sequences that  
165 significantly increased in relative abundance were from species already known to degrade  
166 resistant polysaccharides. RPS increased the relative abundance of *B. faecale/adolescentis/stercoris*  
167 sequences 6.5-fold ( $p<0.001$ ), but there were no significant changes in any of the other sequences  
168 classified in the genus *Bifidobacterium* (Fig. 2). RMS resulted in a 2.5-fold increase in the relative  
169 abundance of sequences classified as *R. bromii* ( $p<0.001$ ), but no significant changes in any of  
170 those classified as *Bifidobacterium* (Fig. 2, Supplemental Table 2). Inulin significantly increased the



171 relative abundance of each of the four most abundant sequences assigned to a *Bifidobacterium*  
172 species (Fig. 2, all  $p < 0.05$ ) and sequences classified as *Anaerostipes hadrus* (Fig. 2, Supplemental  
173 Table 3). No bacterial populations significantly changed in response to the accessible starch  
174 supplement (Fig. 2, Supplemental Table 4).

175  
176 We also noted increases in sequences that were not significant for the population as a whole, but  
177 which were dramatic within a subset of individuals (Supplementary Table 1). RPS increased the  
178 relative abundance of *R. bromii* sequences in a subset of individuals (Fig. 3A), but not for the group  
179 as whole ( $p = 0.72$ ). One of the most striking increases in a smaller subset was in Seq100, classified  
180 as a member of the *Clostridium* cluster IV within the family *Ruminococcaceae*. *Clostridium leptum*  
181 is the closest cultured relative, but their 16S rRNA V4 regions are only 95% identical. This  
182 *Clostridium leptum*-related sequence was detected in 11 of the 50 individuals who consumed RPS,  
183 increasing by an average of 10-fold and exceeding 10% relative abundance in several individuals  
184 (Fig. 3A). Another unanticipated increase was in Seq176 whose V4 region is 98.8% identical to  
185 *Clostridium chartatabidum*, a rumen isolate shown to degrade a variety of dietary fibers (33, 34).  
186 It was rarely detected before supplementation, but its relative abundance increased up to 4%  
187 relative abundance in 11 of the individuals consuming RPS (Fig. 3A). Although a large fold change  
188 for Seq176 was observed in the accessible starch and Hi-Maize groups (Fig 3A), it was limited to  
189 one individual in each group. Seq176 reached only 0.03% and 0.14% relative abundance in those  
190 two individuals after starting below the limit of detection.

191

## 192 **Associations between Butyrate Changes and Community Changes**

193 In individuals consuming RPS, increases in the relative abundance of sequences attributed to  
194 either *R. bromii* or *C. charatabidum* were each associated with an increase in butyrate ( $p=0.025$   
195 and  $p=0.0024$ , Fig. 3B). On average, there was a 9.1 mmol/kg increase in fecal butyrate when  
196 either *R. bromii* or *C. charatabidum* sequences increased in relative abundance in response to RPS.  
197 There was a decrease of 2.1 mmol/kg in individuals in whom neither sequence increased (Fig. 3C).  
198 Furthermore, the presence or absence *R. bromii* prior to RPS supplementation was indicative of  
199 whether an individual would have higher fecal butyrate in response to RPS. Of the 29 individuals  
200 with detectable *R. bromii* at baseline, 22 (76%) had higher fecal butyrate during RPS  
201 supplementation, compared to 5 (36%) of the 14 individuals without detectable *R. bromii*. The  
202 baseline abundance of *C. charatabidum* was not associated with a butyrate response because it  
203 was below the limit of detection ( $<0.008\%$  abundance) in all but five individuals prior to  
204 supplementation. With greater sequencing depth or a more sensitive assay it may be possible to  
205 use the presence of these two organisms to predict whether an individual will respond to RPS with  
206 increased butyrate. Increases in either *B. faecalis/adolescentis/stercoris* or *Clostridium leptum*-like  
207 Seq100 were not associated with an increase in butyrate (Fig. 3B).

208

## 209 **Partnerships Converting Polysaccharides to Butyrate**

210 Increasing *R. bromii* was associated with higher butyrate levels, but butyrate is not a major end  
211 product of *R. bromii* metabolism (35). Therefore, an increase in *R. bromii* is not sufficient in itself  
212 to explain the association with higher butyrate concentrations. Based on our working model (Fig.

213 1), we expected the increase in primary degraders to lead to an increase in the abundance of  
214 butyrate producers (though to a lesser extent because the primary degraders were presumed to  
215 extract most of the nutritional value of the supplements for themselves). To test this expectation,  
216 we correlated the change in abundance of sequences associated with each of the putative primary  
217 degraders with changes in the abundance of the most common known butyrate producers in our  
218 cohort (Fig. 4). Consistent with our model, change in *R. bromii* sequences was positively  
219 correlated with the change in abundance of *E. rectale* sequences (Fig 4). This observation is also  
220 consistent with previous reports that populations of *R. bromii* and *E. rectale* are associated with  
221 each other, both physically and metabolically (22, 24). The relative abundance of *E. rectale* was  
222 also correlated with the concentration of butyrate in the RPS group (Spearman rho=0.42, p<0.001,  
223 Fig. 5), which would explain the higher butyrate in individuals where *R. bromii* increased.

224

## 225 **DISCUSSION**

226 We tested the effects of fermentable fiber supplements on the structure and function of bacterial  
227 communities in the human colon. The three supplements we studied include fractions that are  
228 resistant to degradation by host enzymes and therefore pass through the small intestine to the  
229 colon. There they can be metabolized by specialized bacteria (which distinguishes them from  
230 “bulking fibers” that promote regularity but pass through both small and large intestines without  
231 degradation). Two of the supplements we tested were Type 2 Resistant Starches: unmodified  
232 starches extracted from potato tubers (RPS) or hi-amylose maize seeds (RMS). However, they had  
233 not been pre-treated with  $\alpha$ -amylase so they included some accessible starch. Only 50%-70% of  
234 such flours is in the crystalline form that is resistant to mammalian  $\alpha$ -amylase (23); the rest is  
235 “sensitive” or “accessible” to host enzymes. As a negative control we therefore included a maize

236 starch that is completely digestible by human  $\alpha$ -amylase so it should be broken down in the small  
237 intestine and not affect colonic communities. It was added at a low dose (equivalent to the  
238 sensitive portion of the RMS) or a high dose (equivalent to all the glucose monomers in that  
239 resistant supplement). In neither case did this placebo produce any statistically significant changes  
240 in the microbiota composition or SCFA production during consumption. The third supplement was  
241 the fructose polymer, inulin, that is entirely resistant to digestion in the small intestine.

242  
243 Consuming resistant RPS led to an increase in the average concentration of fecal butyrate (Table  
244 1). Neither inulin nor RMS produced a significant change in butyrate. An important caveat is that  
245 the amount of amylose-resistant polysaccharide consumed was not equal across treatment  
246 groups. The inulin and Hi-Maize groups consumed approximately 20 and 20-24 grams,  
247 respectively, while the RPS group consumed approximately 28-34 grams. However based on  
248 preliminary data, the discrepancy is not sufficient to explain the lack of a butyrogenic effect from  
249 inulin and Hi-Maize. In a pilot study, we observed a significant increase in fecal butyrate in  
250 individuals consuming half the dose of RPS (24 g total, 14-17 g resistant; data not shown). The  
251 butyrogenic response to RPS appears due to the nature of the supplement, not just the amount of  
252 RS it contains. So the answer to our first research question is that the fiber supplements are not  
253 equally effective at stimulating levels of this health-promoting metabolite.

254  
255 All the fermentable fiber supplements had some effect on the fecal community (Fig. 2). In  
256 individuals consuming RPS, the largest and most common change in V4 sequences was an increase  
257 in sequences attributed to *B. faecale/adolescentis/stercoris*. This contrasts with an earlier study of  
258 dietary supplementation with resistant starch Type 3, where *R. bromii* was the dominant

259 responder (22, 36) and was therefore proposed to be a keystone species for the degradation of  
260 resistant starch (18). The different responses in our study could be due to differences in the  
261 supplements, as has been observed previously when Type 2 or Type 4 resistant starches are  
262 consumed (37). The higher abundance of bifidobacteria in our study is consistent with the known  
263 ability of *B. adolescentis* to degrade and ferment RPS *in vitro* (20), but the increase was not  
264 associated with a change in fecal butyrate (Fig. 3B), suggesting that these organisms are not  
265 effectively cross-feeding butyrate producers *in vivo* – even though they can *in vitro* (20, 28, 29). It  
266 is conceivable that *in vivo* production of butyrate from such cross-feeding requires additional time  
267 for interactions to be established in the gut microbiome. Longer-term studies are currently  
268 underway to assess this possibility. The microbiomes in a subset of individuals consuming RPS did  
269 respond with an increase in *R. bromii*-associated sequences. In this group there was an associated  
270 increase in fecal concentrations of butyrate so *R. bromii* may be considered a keystone degrader  
271 with regard to butyrate production in our cohort (Fig. 3B). The major fermentation products of *R.*  
272 *bromii* are acetate, H<sub>2</sub> and CO<sub>2</sub>, but not butyrate (35) so there must be cross-feeding of a  
273 butyrogenic microbe. The most likely candidate is *Eubacterium rectale* because its abundance  
274 increased most consistently with that of *R. bromii* (Fig. 4). Two less-well characterized bacterial  
275 populations also increased in relative abundance in a few individuals consuming RPS. The increase  
276 in the *Clostridium leptum*-related Seq100 was not associated with an increase in butyrate (Fig. 3B),  
277 suggesting that it too may be a degrader but not a cross-feeder. The Seq176 increase was  
278 associated with a butyrate increase (Fig. 3B), which may be because it is both a degrader and a  
279 butyrate producer. The activity of its cultured relative *Clostridium chartatabidum* against RPS is  
280 not documented, but it is a rumen bacterium capable of degrading a variety of plant fibers and, it  
281 produces butyrate (33, 34). Attempts to culture the human strain are underway.

282  
283 Individuals consuming RMS did not respond with an increase in the abundance of *B.*  
284 *faecale/adolescentis/stercoris* sequences. With this supplement, like previous studies (36), an  
285 increase in *R. bromii*-associated sequences was the most common response (Fig. 2). Unlike the  
286 RPS-induced *R. bromii* increase, the increase in *R. bromii* on RMS was not associated with a  
287 significant increase in fecal butyrate. The lack of a butyrogenic response to RMS was unexpected  
288 because the supplement has led to increased fecal butyrate in animal models, though over four  
289 weeks (12). We speculate that the crystal structures of the resistant starches from the two plants  
290 are different because the RPS is phosphorylated (once every 200 glycosyl residues (38)). They may  
291 therefore be degraded with different efficiency or by different strains. Consequently more time  
292 may be required to develop cross-feeding interactions that generate measurable differences in  
293 fecal butyrate.

294  
295 Inulin increased the relative abundance of four species of *Bifidobacterium*, consistent with the  
296 widespread occurrence of this degradative capability within the genus (26). There were also  
297 increases in the abundance of the butyrate producers *Anaerostipes hadrus* and *E. rectale* (Fig. 2),  
298 but they did not result in increased fecal butyrate. The *A. hadrus* may be feeding on the lactate  
299 and acetate produced by the more abundant Bifidobacteria on this supplement (31, 32) or it may  
300 be able to metabolize inulin itself. We note that the low pKa of lactic acid (pKa = 3.86) produced  
301 by the Bifid shunt (30) could reduce fecal pH and inhibit butyrogenic microbes that are sensitive to  
302 the lower pH. Subsequent utilization of lactic acid would restore pH but may extend the time  
303 required to see an effect. Or it could alter the distribution of microbial populations in the GI tract  
304 such that the balance of butyrate consumption and excretion by the host is affected (39). It may

305 also be that lactate produced by *Bifidobacterium* species was converted to fermentation products  
306 other than butyrate. Notably propionate increased by 27% on average with inulin consumption,  
307 though the change was not statistically significant due to high variability. Other than  
308 *Bifidobacterium spp.* and *A. hadrus*, there were no significant increases in any other sequences  
309 (Supplementary Table 3), surprisingly including *F. prausnitzii* (which has the metabolic capacity to  
310 ferment inulin to butyrate (27)).

311  
312 Thus we observed that all the fermentable fiber supplements we tested increased the relative  
313 abundances of some members of the fecal microbiota. Most of the affected sequences are  
314 associated with known degraders of resistant polysaccharides or producers of butyrate but we did  
315 uncover two Firmicutes not previously associated with fiber supplements. The organisms  
316 responding depended both on the individual and the supplement (research question 2).

317  
318 Together our observations on SCFA and community composition changes suggest that the working  
319 model for stimulating butyrate production with fiber supplements (Fig. 1) is an over-simplification,  
320 in that fiber degradation does not always lead to butyrate production. The requirement for fiber  
321 breakdown by specialized primary degraders appears to hold, with lack of an appropriate degrader  
322 preventing butyrate increase. However, not all degraders lead to a butyrogenic response. The lack  
323 of enhanced butyrate production in *Bifidobacterium*-responding microbiomes suggests that while  
324 bifidobacteria are particularly effective at using some fiber supplements, they do not establish  
325 cross-feeding reactions with butyrogenic populations as readily as *Ruminococcus*-responsive  
326 microbiomes. Furthermore, the concept of a wide variety of butyrate-producing organisms having  
327 ready access to the products of degradation and fermentation is not supported. Even though many

328 of these organisms can be cross-fed by primary degraders *in vitro* (20, 22, 28, 29), the *in vivo*  
329 scenario seems much more restricted. The only butyrate producer whose abundance increased  
330 with a primary degrader (Fig. 4) and was associated with higher fecal butyrate (Fig. 5) is *E. rectale*.  
331 This organism has a multi-protein, cell-wall attached system for degrading sensitive starch (40). It  
332 includes carbohydrate binding domains that enable it to attach to RS granules (but not degrade  
333 them), as well as ABC transporter proteins that capture oligosaccharide degradation products of  
334 the same size as those preferred for growth of *R. bromii* (22). It has been shown to co-localize  
335 with *R. bromii* on starch granules (24) and to grow on the products of RS degradation by *R. bromii*  
336 *in vitro* (22). It thus has the characteristics of a preferred partner in converting RPS to butyrate  
337 (research question 3). A single organism, such as *C. chartatabidum*, may be an alternative route,  
338 but it occurs in fewer individuals. If the *C. chartatabidum*-related organism from this cohort is  
339 indeed a primary degrader of RPS that produces butyrate, it would be an appealing probiotic to  
340 give in combination with RPS to enhance butyrate production in a larger percentage of individuals.

341  
342 To improve the efficacy of dietary supplements like these, it may be necessary to personalize them  
343 according to an individual's gut microbiota (41). The presence of *R. bromii* or *C. chartatabidum*  
344 suggests whether a gut microbiome would yield increased butyrate concentrations following  
345 short-term (2-week) supplementation with RPS (research question 4). Individuals without *R. bromii*  
346 in their gut microbiome may benefit from a probiotic supplementation with *R. bromii* to increase  
347 the likelihood of a butyrogenic response to RPS. There may also be a synergistic effect of  
348 combining RPS with both *R. bromii* and *E. rectale* to maximize the butyrogenic effect of the  
349 supplement. In contrast, microbiomes with high levels of bifidobacteria are less likely to increase  
350 butyrate production in response to RPS (or inulin), at least in the short term. In these



351 microbiomes, a different supplement or combination of supplements may be needed, or a longer  
352 period of time may be required for the microbiome to respond to the supplement. Such  
353 considerations are necessary when attempting to effect a particular change in the highly variable  
354 structures of human gut communities.

355

## 356 **MATERIALS AND METHODS**

### 357 **Study Participants**

358 Study participants were recruited through the Authentic Research Sections of the introductory  
359 biology laboratory course at the University of Michigan (BIO173). Individuals with self-reported  
360 history of inflammatory bowel syndrome, inflammatory bowel disease, or colorectal cancer were  
361 excluded from the study, as were individuals who had taken antibiotics within the last 6 months.  
362 Pre- or probiotic usage was not an exclusion criterion for the study. Nor was the amount of fiber  
363 already being consumed. All participants gave written, informed consent prior to participating in  
364 the study. Participants under the age of 18 were granted permission by a parent or legal guardian.  
365 Participants ranged in age from 17 to 29, with a median age of 19. This study was approved by the  
366 Institutional Review Board of the University of Michigan Medical School (HUM00094242 and  
367 HUM00118951) and was conducted in compliance with the Helsinki Declaration.

368

369 The participants were randomly assigned to study groups. During the first semester they were  
370 blinded to the supplement they were taking; in subsequent studies they were informed of its  
371 identity. Researchers analyzing samples were always blinded to the supplement associated with  
372 the samples. Some participants were excluded from the analysis because fewer than three  
373 samples were collected or successfully analyzed either before or during dietary supplementation.

374

## 375 **Study Design**

376 This replicated intervention study was conducted during four separate academic semesters from  
377 the fall of 2015 to the spring of 2017. It was a parallel design with different but similar groups  
378 taking experimental or control supplements. Replicated baseline data were collected for each  
379 individual during the first week of each study. Each participant collected 3 to 4 fecal samples on  
380 separate days during this period. During the second week, participants underwent a 4- to 7-day  
381 transition phase, that began with consumption of a half dose of the supplement before taking the  
382 full dose. No fecal samples were collected during the transition phase. In the third week of the  
383 study participants continued taking the full dose of their assigned supplement until they had  
384 collected 3 to 4 fecal samples on separate days.

385

## 386 **Dietary Supplements**

387 Four different supplements were tested in this study; resistant potato starch (RPS, Bob's Red Mill,  
388 Milwaukee OR), Hi-Maize 260 resistant corn starch (RMS, manufactured by Ingredion Inc.,  
389 Westchester, IL and distributed by myworldhut.com), inulin isolated from chicory root (Swanson  
390 Health Products, Fargo, ND), and amylase-accessible corn starch (Amioca powder, Skidmore Sales  
391 and Distribution, West Chester OH). Preliminary studies suggested that 40-48 g of supplement  
392 could be comfortably consumed per day. This amount was therefore used for the studies with RPS  
393 and RMS. However, it should be noted that these supplements do not contain the same  
394 proportion of amylase-resistant starch: RPS contains approximately 70% RS (Type 2) by weight and  
395 RMS approximately 50% (23). Subjects therefore consumed 28 – 34 grams of RPS or 20 – 24 grams  
396 of RMS per day. The inulin supplement, which is resistant to human enzymes (42), was consumed

397 at 20 g/day to provide a similar amount of resistant polysaccharide. The accessible starch  
398 supplement was given at either 40 g/day (n=15) to provide a similar amount of total carbohydrates  
399 or at 20 g/day (n=24) to provide approximately the same amount of host-accessible  
400 carbohydrates. Consumption of the supplements was split into two half doses per day and logged  
401 on the study website. Participants were provided with a shaker bottle to aid in mixing the  
402 supplement with water, however they were permitted to consume the supplement with any type  
403 of food or beverage. Participants were instructed not to add the supplement to any warm food or  
404 beverage. Aside from the supplement, participants maintained their normal diet throughout the  
405 study.

406

#### 407 **Fecal Collection**

408 Fecal samples were collected by participants as described previously (10). Participants collected  
409 approximately half a gram of fecal material into an OMNIgene-Gut® (DNA Genotek) collection kit,  
410 following manufacturer instructions. Collection tubes were transferred to a -20°C freezer within 24  
411 hours of collection and stored at -20°C until thawed for DNA and metabolite extractions. Collection  
412 tubes were weighed before and after fecal collection, to determine the weight of the fecal  
413 material collected.

414

#### 415 **SCFA Quantification**

416 To extract SCFAs, 1 ml of fecal suspension was transferred into a 2 ml 96-well V-bottom collection  
417 plate and centrifuged at 4,500 x G for 15 minutes at 4°C. 200 µl of supernatant fractions were  
418 successively filtered through 1.20, 0.65, and 0.22 µm 96-well filter plates at 4°C. Filtrates were  
419 transferred into 1.5 ml screw cap vials containing 100 µl inserts in preparation for analysis by high-

420 performance liquid chromatography (HPLC). Samples were analyzed in a randomized order.  
421 Quantification of SCFAs was performed using a Shimadzu HPLC system (Shimadzu Scientific  
422 Instruments, Columbia, MD) that included an LC-10AD vp pump A, LC-10AD vp pump B, degasser  
423 DGU-14A, CBM-20A, autosampler SIL-10AD HT, Column heater CTO- 10A(C) vp, UV detector SPD-  
424 10A(V) vp, and an Aminex HPX-87H column (Bio-Rad Laboratories, Hercules, CA). We used a  
425 mobile phase of 0.01 N H<sub>2</sub>SO<sub>4</sub> at a total flow rate of 0.6 ml per minute with the column oven  
426 temperature at 50°C. The sample injection volume was 10 µl and each sample eluted for 40  
427 minutes. Concentrations were calculated using a cocktail of short chain organic acids standards at  
428 concentrations of 20, 10, 5, 2.5, 1, 0.5, 0.25, and 0.1 mM. After correcting the baseline of  
429 chromatographs, the quality of peaks was assessed using peak width, relative retention time, and  
430 5% width. Peaks that fell outside predetermined cutoffs for relative retention time and peak width  
431 were removed. Concentrations in experimental samples were normalized to the wet weight of  
432 fecal material.

433

#### 434 **16S rRNA gene sequencing**

435 DNA was extracted from 250 µl of fecal suspension using the 96-well MagAttract  
436 PowerMicrobiome DNA Isolation kit (Qiagen) and EpMotion liquid handling systems (Eppendorf).  
437 The V4 region of the bacterial 16S rRNA gene was amplified and sequenced as described  
438 previously using 2 x 250 base pair paired end kits on the Illumina MiSeq sequencing platform (43).  
439 Samples were assigned randomly to different runs each semester, with 8 separate DNA  
440 sequencing runs in total. Sequences were curated using the mothur software package as described  
441 previously (43, 44). Briefly, paired end reads were merged into contigs, screened for sequencing  
442 errors, and aligned to the SILVA bacterial SSU reference database. Aligned sequences were

443 screened for chimeras and classified using the Ribosomal Database Project database. Sequences  
444 classified as mitochondria, chloroplasts, or archaea were removed. Sequences of interest were  
445 further identified using BLAST to align against the 16S rRNA gene sequences database. Unless  
446 stated otherwise, species designations indicate 100% identity to a single species in the database.  
447 The number of sequences per sample was rarified to 3000 to prevent biases from uneven  
448 sampling.

449

## 450 **Statistical analyses**

451 All statistical analyses were performed using R (version 3.2.4) via RStudio (version 1.0.136). To  
452 determine whether there was a significant change in SCFA concentration from before to during  
453 fiber supplementation, we performed repeated measures ANOVAs on SCFA concentrations in all  
454 fecal samples from individuals consuming each supplement. For other analyses, we used the  
455 median SCFA concentration within each individual at each time point. Changes in the overall  
456 community structure in response to supplements were assessed using a within-subjects  
457 PERMANOVA on Bray-Curtis distances. Diversity was compared using repeated measures ANOVA  
458 on the inverse Simpson index for each sample. For other comparisons of the relative abundance of  
459 microbiota we used the average relative abundance within each individual at each time point,  
460 yielding a single average community structure for each individual before and during  
461 supplementation. Organisms that increased the most in response to each supplement were  
462 identified using one-tailed paired Wilcoxon-tests on the average abundances in each subject  
463 before and during supplementation with Benjamini-Hochberg correction for multiple comparisons  
464 (45). P-values in Figure 2 were corrected for the multiple tests applied to those 14 species, which  
465 were *a priori* expected to important for fiber degradation and/or butyrate production, while p-

466 values in Supplemental Tables 1-4 were corrected for test across all 500 sequences. Correlation  
467 between the changes in abundance of primary degraders and butyrate producers (Fig. 4) were  
468 calculated using Spearman correlation with Benjamini-Hochberg correction for multiple  
469 comparisons. Raw sequencing reads and metadata, including SCFA concentrations, are available  
470 through the NCBI Short Read Archive under accession number SRP128128.

471

## 472 **ACKNOWLEDGEMENTS**

473 This research was supported by grants from the Procter and Gamble Company, Howard Hughes  
474 Medical Institute (52008119), and the University of Michigan Host Microbiome Initiative. The  
475 authors declare that they have no competing interests.

476

477 The authors thank the students of Biology 173 who participated in this study and the University of  
478 Michigan Microbial Systems Molecular Biology Laboratory for performing 16S rRNA gene library  
479 preparation and sequencing.

## 480 **REFERENCES**

- 481 1. Furusawa Y, Obata Y, Fukuda S, Endo TA, Nakato G, Takahashi D, Nakanishi Y, Uetake C,  
482 Kato K, Kato T, Takahashi M, Fukuda NN, Murakami S, Miyauchi E, Hino S, Atarashi K,  
483 Onawa S, Fujimura Y, Lockett T, Clarke JM, Topping DL, Tomita M, Hori S, Ohara O, Morita  
484 T, Koseki H, Kikuchi J, Honda K, Hase K, Ohno H. 2013. Commensal microbe-derived  
485 butyrate induces the differentiation of colonic regulatory T cells. *Nature* 504:446-50.

- 486 2. Peng L, Li ZR, Green RS, Holzman IR, Lin J. 2009. Butyrate enhances the intestinal barrier by  
487 facilitating tight junction assembly via activation of AMP-activated protein kinase in Caco-2  
488 cell monolayers. *J Nutr* 139:1619-25.
- 489 3. Ruemmele FM, Schwartz S, Seidman EG, Dionne S, Levy E, Lentze MJ. 2003. Butyrate  
490 induced Caco-2 cell apoptosis is mediated via the mitochondrial pathway. *Gut* 52:94-100.
- 491 4. Mikkelsen KH, Frost M, Bahl MI, Licht TR, Jensen US, Rosenberg J, Pedersen O, Hansen T,  
492 Rehfeld JF, Holst JJ, Vilsboll T, Knop FK. 2015. Effect of Antibiotics on Gut Microbiota, Gut  
493 Hormones and Glucose Metabolism. *PLoS One* 10:e0142352.
- 494 5. Wang L, Luo HS, Xia H. 2009. Sodium butyrate induces human colon carcinoma HT-29 cell  
495 apoptosis through a mitochondrial pathway. *J Int Med Res* 37:803-11.
- 496 6. Segain JP, de la Bletiere DR, Bourreille A, Leray V, Gervois N, Rosales C, Ferrier L, Bonnet C,  
497 Blottiere HM, Galmiche JP. 2000. Butyrate inhibits inflammatory responses through NF  
498 kappa B inhibition: implications for Crohn's disease. *Gut* 47:397-403.
- 499 7. Mathewson ND, Jenq R, Mathew AV, Koenigsnecht M, Hanash A, Toubai T, Oravec-  
500 Wilson K, Wu SR, Sun Y, Rossi C, Fujiwara H, Byun J, Shono Y, Lindemans C, Calafiore M,  
501 Schmidt TC, Honda K, Young VB, Pennathur S, van den Brink M, Reddy P. 2016. Gut  
502 microbiome-derived metabolites modulate intestinal epithelial cell damage and mitigate  
503 graft-versus-host disease. *Nat Immunol* 17:505-13.
- 504 8. Gao Z, Yin J, Zhang J, Ward RE, Martin RJ, Lefevre M, Cefalu WT, Ye J. 2009. Butyrate  
505 improves insulin sensitivity and increases energy expenditure in mice. *Diabetes* 58:1509-  
506 17.
- 507 9. Lin HV, Frassetto A, Kowalik EJ, Jr., Nawrocki AR, Lu MM, Kosinski JR, Hubert JA, Szeto D,  
508 Yao X, Forrest G, Marsh DJ. 2012. Butyrate and propionate protect against diet-induced

- 509 obesity and regulate gut hormones via free fatty acid receptor 3-independent mechanisms.  
510 PLoS One 7:e35240.
- 511 10. Venkataraman A, Sieber JR, Schmidt AW, Waldron C, Theis KR, Schmidt TM. 2016. Variable  
512 responses of human microbiomes to dietary supplementation with resistant starch.  
513 Microbiome 4:33.
- 514 11. Welters CF, Heineman E, Thunnissen FB, van den Bogaard AE, Soeters PB, Baeten CG. 2002.  
515 Effect of dietary inulin supplementation on inflammation of pouch mucosa in patients with  
516 an ileal pouch-anal anastomosis. Dis Colon Rectum 45:621-7.
- 517 12. Le Leu RK, Hu Y, Brown IL, Young GP. 2009. Effect of high amylose maize starches on  
518 colonic fermentation and apoptotic response to DNA-damage in the colon of rats. Nutr  
519 Metab (Lond) 6:11.
- 520 13. Harsch IA, Konturek PC. 2018. The Role of Gut Microbiota in Obesity and Type 2 and Type 1  
521 Diabetes Mellitus: New Insights into "Old" Diseases. Med Sci (Basel) 6.
- 522 14. Brown JM, Hazen SL. 2018. Microbial modulation of cardiovascular disease. Nat Rev  
523 Microbiol 16:171-181.
- 524 15. Makki K, Deehan EC, Walter J, Backhed F. 2018. The Impact of Dietary Fiber on Gut  
525 Microbiota in Host Health and Disease. Cell Host Microbe 23:705-715.
- 526 16. Deehan EC, Duar RM, Armet AM, Perez-Munoz ME, Jin M, Walter J. 2017. Modulation of  
527 the Gastrointestinal Microbiome with Nondigestible Fermentable Carbohydrates To  
528 Improve Human Health. Microbiol Spectr 5.
- 529 17. Cockburn DW, Koropatkin NM. 2016. Polysaccharide Degradation by the Intestinal  
530 Microbiota and Its Influence on Human Health and Disease. J Mol Biol 428:3230-3252.



- 531 18. Watson D, O'Connell Motherway M, Schoterman MH, van Neerven RJ, Nauta A, van  
532 Sinderen D. 2013. Selective carbohydrate utilization by lactobacilli and bifidobacteria. *J*  
533 *Appl Microbiol* 114:1132-46.
- 534 19. Flint HJ, Scott KP, Duncan SH, Louis P, Forano E. 2012. Microbial degradation of complex  
535 carbohydrates in the gut. *Gut Microbes* 3:289-306.
- 536 20. Belenguer A, Duncan SH, Calder AG, Holtrop G, Louis P, Lobley GE, Flint HJ. 2006. Two  
537 routes of metabolic cross-feeding between *Bifidobacterium adolescentis* and butyrate-  
538 producing anaerobes from the human gut. *Appl Environ Microbiol* 72:3593-9.
- 539 21. Louis P, Flint HJ. 2017. Formation of propionate and butyrate by the human colonic  
540 microbiota. *Environ Microbiol* 19:29-41.
- 541 22. Ze X, Duncan SH, Louis P, Flint HJ. 2012. *Ruminococcus bromii* is a keystone species for the  
542 degradation of resistant starch in the human colon. *ISME J* 6:1535-43.
- 543 23. Bednar GE, Patil AR, Murray SM, Grieshop CM, Merchen NR, Fahey GC, Jr. 2001. Starch and  
544 fiber fractions in selected food and feed ingredients affect their small intestinal digestibility  
545 and fermentability and their large bowel fermentability in vitro in a canine model. *J Nutr*  
546 131:276-86.
- 547 24. Leitch EC, Walker AW, Duncan SH, Holtrop G, Flint HJ. 2007. Selective colonization of  
548 insoluble substrates by human faecal bacteria. *Environ Microbiol* 9:667-79.
- 549 25. El Kaoutari A, Armougom F, Gordon JI, Raoult D, Henrissat B. 2013. The abundance and  
550 variety of carbohydrate-active enzymes in the human gut microbiota. *Nat Rev Microbiol*  
551 11:497-504.

- 552 26. Rossi M, Corradini C, Amaretti A, Nicolini M, Pompei A, Zaroni S, Matteuzzi D. 2005.  
553 Fermentation of fructooligosaccharides and inulin by bifidobacteria: a comparative study of  
554 pure and fecal cultures. *Applied and Environmental Microbiology* 71:6150-6158.
- 555 27. Moens F, De Vuyst L. 2017. Inulin-type fructan degradation capacity of *Clostridium* cluster  
556 IV and XIVa butyrate-producing colon bacteria and their associated metabolic outcomes.  
557 *Benef Microbes* 8:473-490.
- 558 28. Falony G, Vlachou A, Verbrugghe K, De Vuyst L. 2006. Cross-feeding between  
559 *Bifidobacterium longum* BB536 and acetate-converting, butyrate-producing colon bacteria  
560 during growth on oligofructose. *Appl Environ Microbiol* 72:7835-41.
- 561 29. Rios-Covian D, Gueimonde M, Duncan SH, Flint HJ, de los Reyes-Gavilan CG. 2015.  
562 Enhanced butyrate formation by cross-feeding between *Faecalibacterium prausnitzii* and  
563 *Bifidobacterium adolescentis*. *FEMS Microbiol Lett* 362.
- 564 30. Scardovi V, Trovatelli LD. 1965. The fructose-6-phosphate shunt as a peculiar pattern of  
565 hexose degradation in the genus *Bifidobacterium*. *Annals of Microbiology* 15:19-29.
- 566 31. Allen-Vercoe E, Daigneault M, White A, Panaccione R, Duncan SH, Flint HJ, O'Neal L,  
567 Lawson PA. 2012. *Anaerostipes hadrus* comb. nov., a dominant species within the human  
568 colonic microbiota; reclassification of *Eubacterium hadrum* Moore et al. 1976. *Anaerobe*  
569 18:523-9.
- 570 32. Duncan SH, Louis P, Flint HJ. 2004. Lactate-utilizing bacteria, isolated from human feces,  
571 that produce butyrate as a major fermentation product. *Appl Environ Microbiol* 70:5810-7.
- 572 33. Kelly WJ, Asmundson RV, Hopcroft DH. 1987. Isolation and characterization of a strictly  
573 anaerobic, cellulolytic spore former: *Clostridium chartatabidum* sp. nov. *Arch Microbiol*  
574 147:169-73.

- 575 34. Yang JC, Chynoweth DP, Williams DS, Li A. 1990. Clostridium-Aldrichii Sp-Nov, a Cellulolytic  
576 Mesophile Inhabiting a Wood-Fermenting Anaerobic Digester. International Journal of  
577 Systematic Bacteriology 40:268-272.
- 578 35. (ed). 2009. Bergey's manual of systematic bacteriology. Volume three, The firmicutes.  
579 Springer, Dordrecht ; New York. Accessed
- 580 36. Walker AW, Ince J, Duncan SH, Webster LM, Holtrop G, Ze X, Brown D, Stares MD, Scott P,  
581 Bergerat A, Louis P, McIntosh F, Johnstone AM, Lobley GE, Parkhill J, Flint HJ. 2011.  
582 Dominant and diet-responsive groups of bacteria within the human colonic microbiota.  
583 ISME J 5:220-30.
- 584 37. Martinez I, Kim J, Duffy PR, Schlegel VL, Walter J. 2010. Resistant starches types 2 and 4  
585 have differential effects on the composition of the fecal microbiota in human subjects.  
586 PLoS One 5:e15046.
- 587 38. Nielsen TH, Wischmann B, Enevoldsen K, Moller BL. 1994. Starch Phosphorylation in Potato  
588 Tubers Proceeds Concurrently with de Novo Biosynthesis of Starch. Plant Physiol 105:111-  
589 117.
- 590 39. Donaldson GP, Lee SM, Mazmanian SK. 2016. Gut biogeography of the bacterial microbiota.  
591 Nat Rev Microbiol 14:20-32.
- 592 40. Cockburn DW, Suh C, Medina KP, Duvall RM, Wawrzak Z, Henrissat B, Koropatkin NM.  
593 2018. Novel carbohydrate binding modules in the surface anchored alpha-amylase of  
594 Eubacterium rectale provide a molecular rationale for the range of starches used by this  
595 organism in the human gut. Mol Microbiol 107:249-264.
- 596 41. Zeevi D, Korem T, Zmora N, Israeli D, Rothschild D, Weinberger A, Ben-Yacov O, Lador D,  
597 Avnit-Sagi T, Lotan-Pompan M, Suez J, Mahdi JA, Matot E, Malka G, Kosower N, Rein M,

- 598 Zilberman-Schapira G, Dohnalova L, Pevsner-Fischer M, Bikovsky R, Halpern Z, Elinav E,  
599 Segal E. 2015. Personalized Nutrition by Prediction of Glycemic Responses. *Cell* 163:1079-  
600 1094.
- 601 42. Niness KR. 1999. Inulin and oligofructose: what are they? *J Nutr* 129:1402S-6S.
- 602 43. Kozich JJ, Westcott SL, Baxter NT, Highlander SK, Schloss PD. 2013. Development of a dual-  
603 index sequencing strategy and curation pipeline for analyzing amplicon sequence data on  
604 the MiSeq Illumina sequencing platform. *Appl Environ Microbiol* 79:5112-20.
- 605 44. Schloss PD, Westcott SL, Ryabin T, Hall JR, Hartmann M, Hollister EB, Lesniewski RA, Oakley  
606 BB, Parks DH, Robinson CJ, Sahl JW, Stres B, Thallinger GG, Van Horn DJ, Weber CF. 2009.  
607 Introducing mothur: open-source, platform-independent, community-supported software  
608 for describing and comparing microbial communities. *Appl Environ Microbiol* 75:7537-41.
- 609 45. Benjamini Y, Hochberg Y. 1995. Controlling the false discovery rate: a practical and  
610 powerful approach to multiple testing. *Journal of the royal statistical society Series B*  
611 (Methodological):289-300.
- 612
- 613

614 **FIGURE LEGENDS**

615

616 **Figure 1.** Proposed model of metabolites and microbes that catalyze the flow of carbon from  
617 resistant polysaccharides to butyrate. There are cultivated strains from the gut microbiome that  
618 possess the metabolic activities proposed for the species listed.

619

620 **Figure 2.** Average fold changes in the relative abundance of sequences representing selected  
621 primary degraders of resistant polysaccharides and secondary butyrate fermenters in response to  
622 dietary supplements (\*  $p < 0.05$ , paired Wilcoxon test). Seq100 represents an unknown species in  
623 the family Ruminococcaceae while seq176 is 98.8% identical to *Clostridium chartatabidum*. Both  
624 are inferred to be primary degraders (dashed bracket) based on the dynamics of their response to  
625 dietary supplements. Bar plot to the right shows the average relative abundance of each species  
626 prior to fiber supplementation.

627

628 **Figure 3.** Associations between primary degraders and changes in fecal butyrate concentrations in  
629 response to dietary supplementation with resistant potato starch (RPS). For all panels, darker  
630 shades indicate an increase in abundance or concentration and lighter shades indicate a decrease  
631 or no change. (A) Average relative abundance of putative primary degraders in each individual  
632 before (Bef) and during (Dur) RPS supplementation. (B) Change in fecal butyrate in individuals  
633 grouped on whether a primary degrader increased ( $\Delta > 0$ ) or did not increase ( $\Delta \leq 0$ ) in relative  
634 abundance in response to RPS supplementation (\*  $p < 0.05$ , t-test). (C) Butyrate concentrations for  
635 each individual before (circles) and during (triangles) RPS supplementation. Subjects are sorted by  
636 initial butyrate concentration.

637

638 **Figure 4.** Pairs of microbes that consistently responded in concert either positively (red) or  
639 negatively (blue) to dietary supplementation. Correlations between changes in the abundance of  
640 primary degraders and butyrate producers were calculated using the combined dataset that  
641 includes responses to all supplements.

642

643 **Figure 5.** Positive relationship between fecal butyrate concentrations and the relative abundance  
644 of sequences characterized as *E. rectale* both before and during dietary supplementation with RPS.

645 **TABLES**

646

647 **Table 1.**

| Substrate            | Butyrate              |                       |        |                  | Acetate               |                       |        |               | Propionate            |                       |        |         |
|----------------------|-----------------------|-----------------------|--------|------------------|-----------------------|-----------------------|--------|---------------|-----------------------|-----------------------|--------|---------|
|                      | before<br>(mean ± SD) | during<br>(mean ± SD) | Change | p-value          | before<br>(mean ± SD) | during<br>(mean ± SD) | Change | p-value       | before<br>(mean ± SD) | during<br>(mean ± SD) | Change | p-value |
| Accessible<br>(n=39) | 13 ± 6.1              | 15 ± 8.3              | +13%   | 0.18             | 41 ± 17               | 41 ± 16               | 0%     | 0.89          | 9.9 ± 6.0             | 9.3 ± 6.5             | -6%    | 0.47    |
| Hi-Maize<br>(n=43)   | 9.3 ± 4.1             | 9.7 ± 5.6             | +5%    | 0.81             | 37 ± 17               | 33 ± 15               | -10%   | 0.20          | 12 ± 15               | 12 ± 13               | +0.3%  | 0.81    |
| Potato<br>(n=43)     | 13 ± 6.0              | 16 ± 7.5              | +29%   | <b>&lt;0.001</b> | 48 ± 22               | 58 ± 26               | +21%   | <b>0.0012</b> | 10 ± 7.7              | 8.6 ± 5.3             | -16%   | 0.39    |
| Inulin<br>(n=49)     | 11 ± 6.0              | 13 ± 7.0              | +17%   | 0.14             | 38 ± 18               | 41 ± 20               | +8%    | 0.077         | 11 ± 10               | 13 ± 15               | +27%   | 0.31    |

648 The concentrations of fecal SCFAs (in mmoles/kg) before and during dietary supplements. All p-

649 values are based on repeated measures ANOVA.

## Resistant Polysaccharides

- Hi-Maize
- Potato Starch
- Inulin

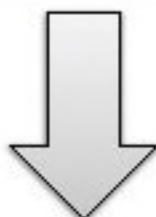

## 1° Degradors

- *Bifidobacterium* spp.
- *Ruminococcus bromii*
- Others

## Intermediate Products

- Acetate
- Lactate
- Mono/Oligosaccharides

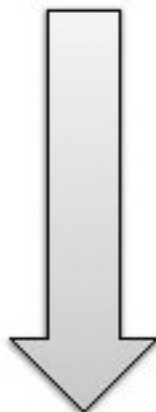

## Butyrate producers

- *Faecalibacterium prausnitzii*
- *Eubacterium rectale*
- *Roseburia faecis*
- *Roseburia intestinalis*
- *Roseburia inulinivorans*
- *Eubacterium halii*
- *Anaerostipes hadrus*

Butyrate



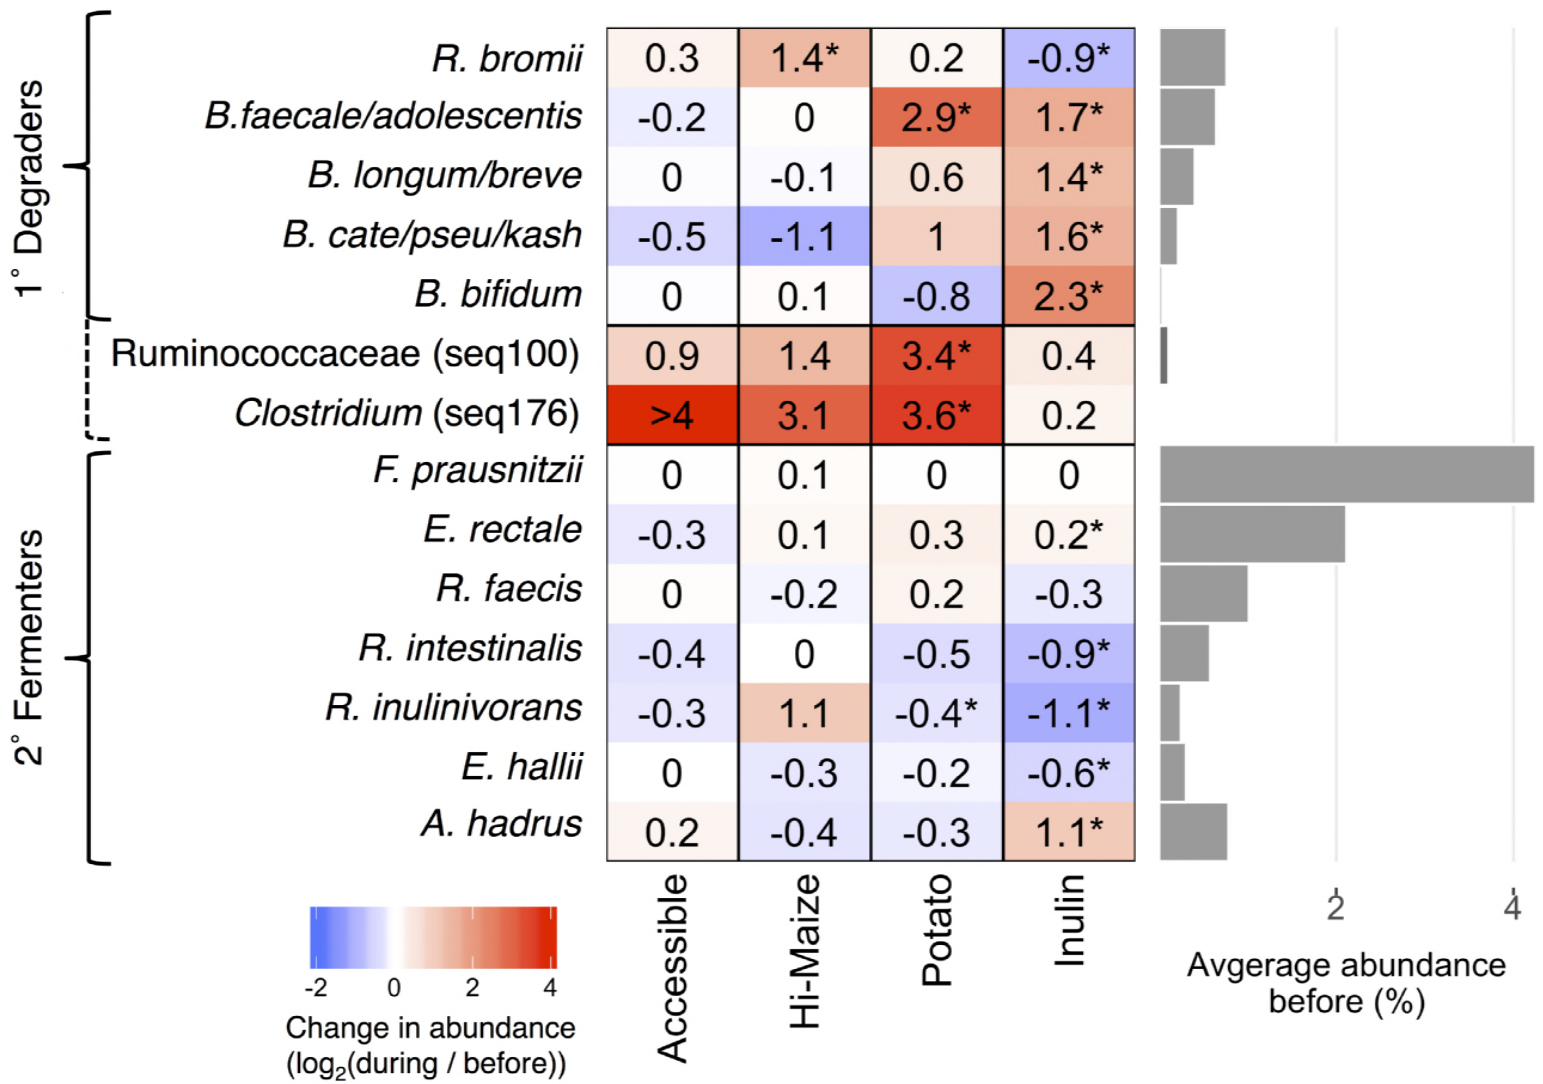

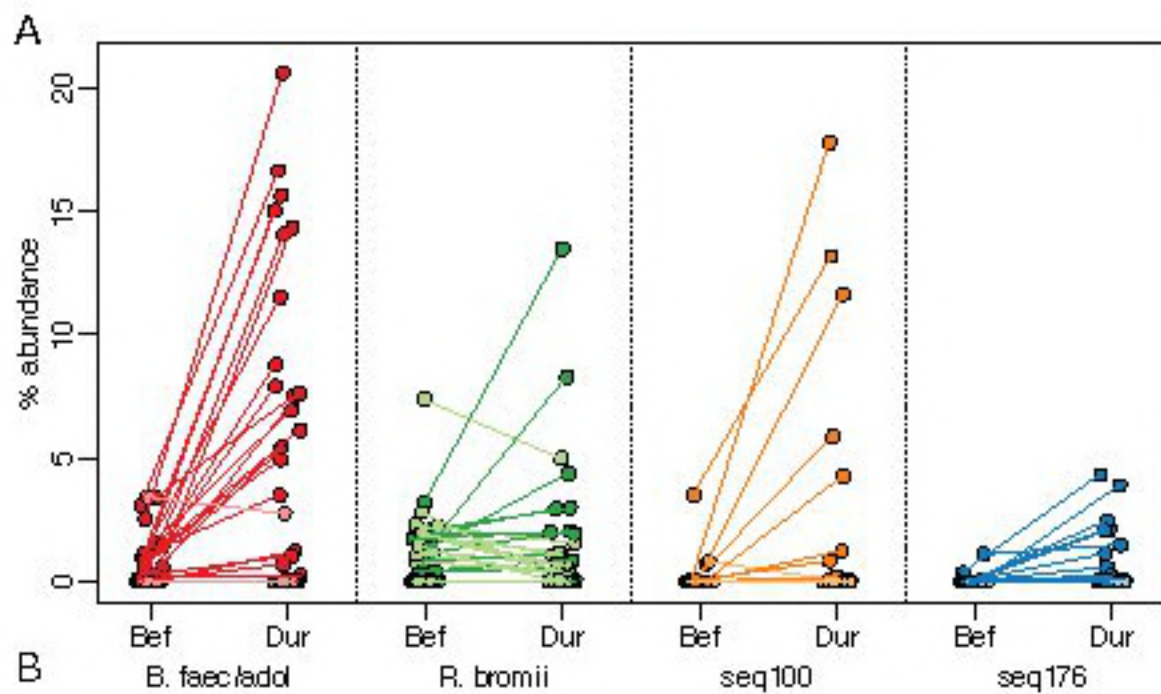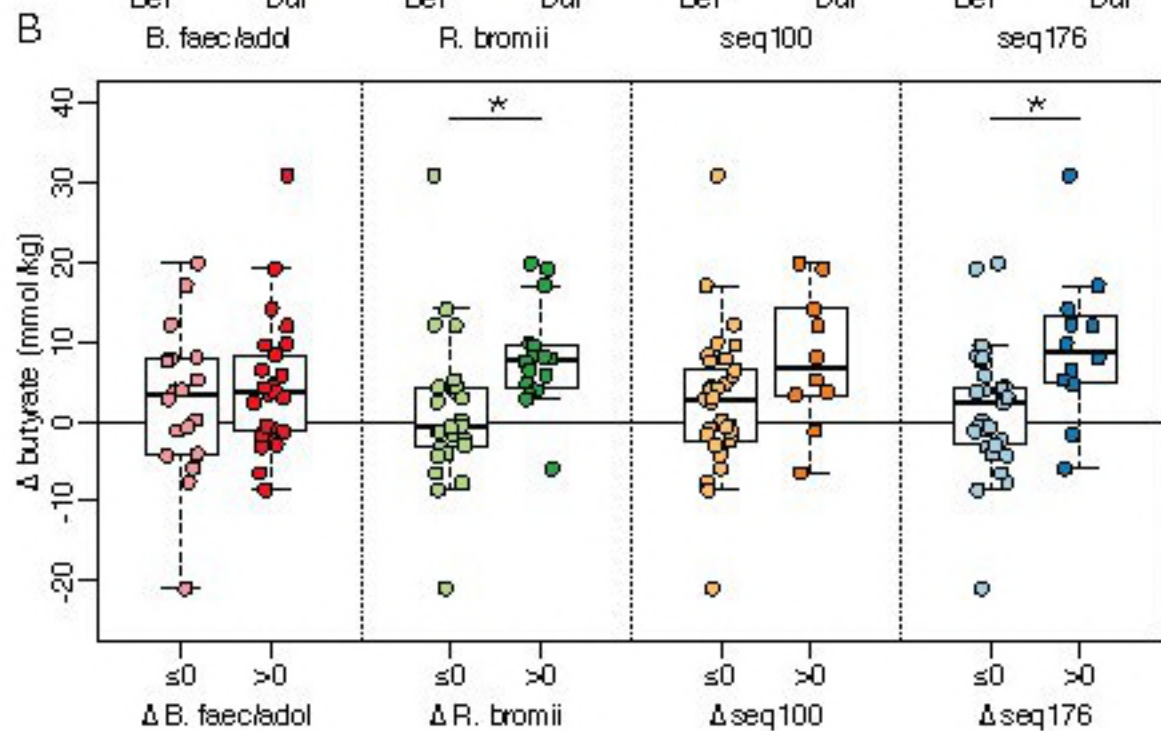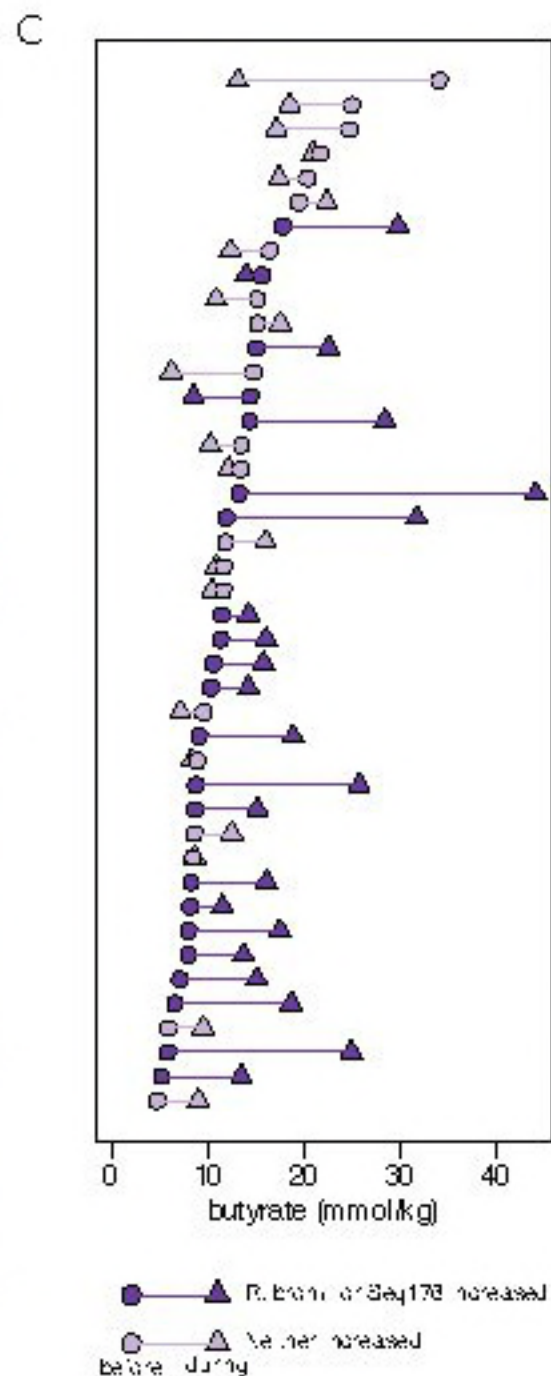

Primary Degraders  
( $\Delta$  abundance)

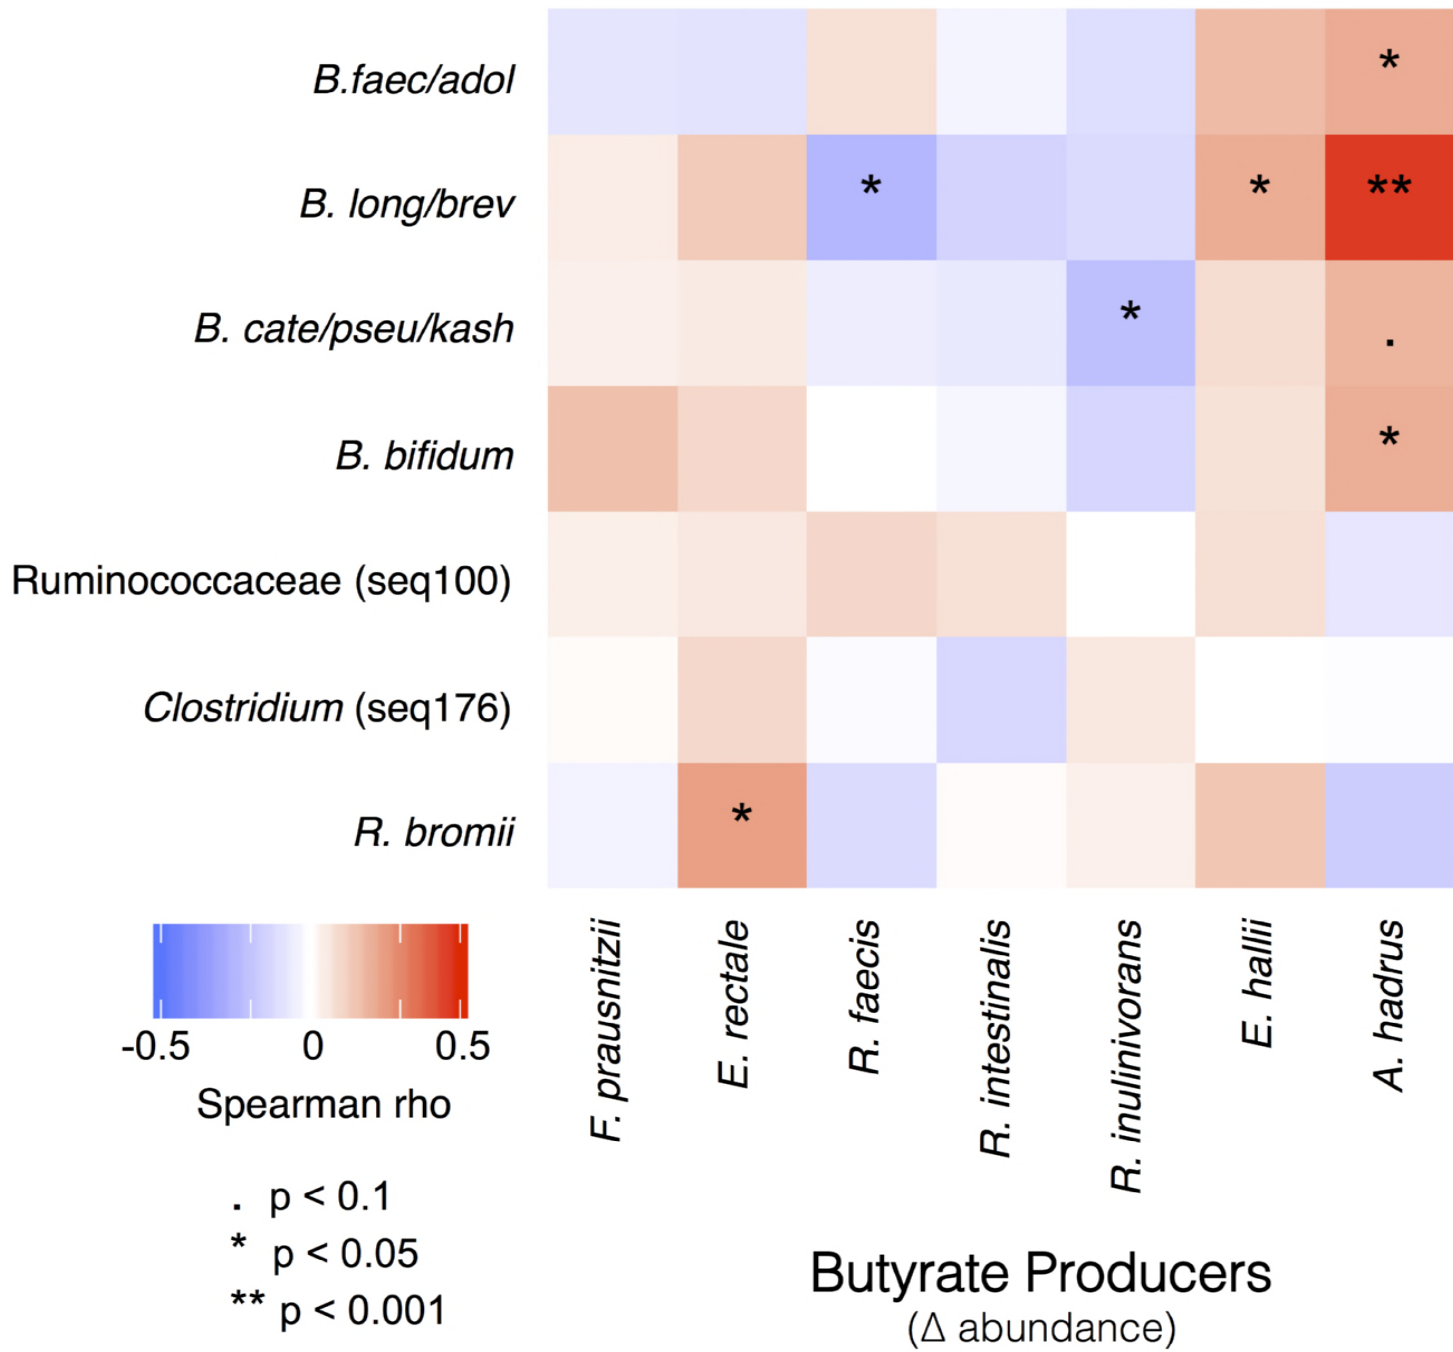

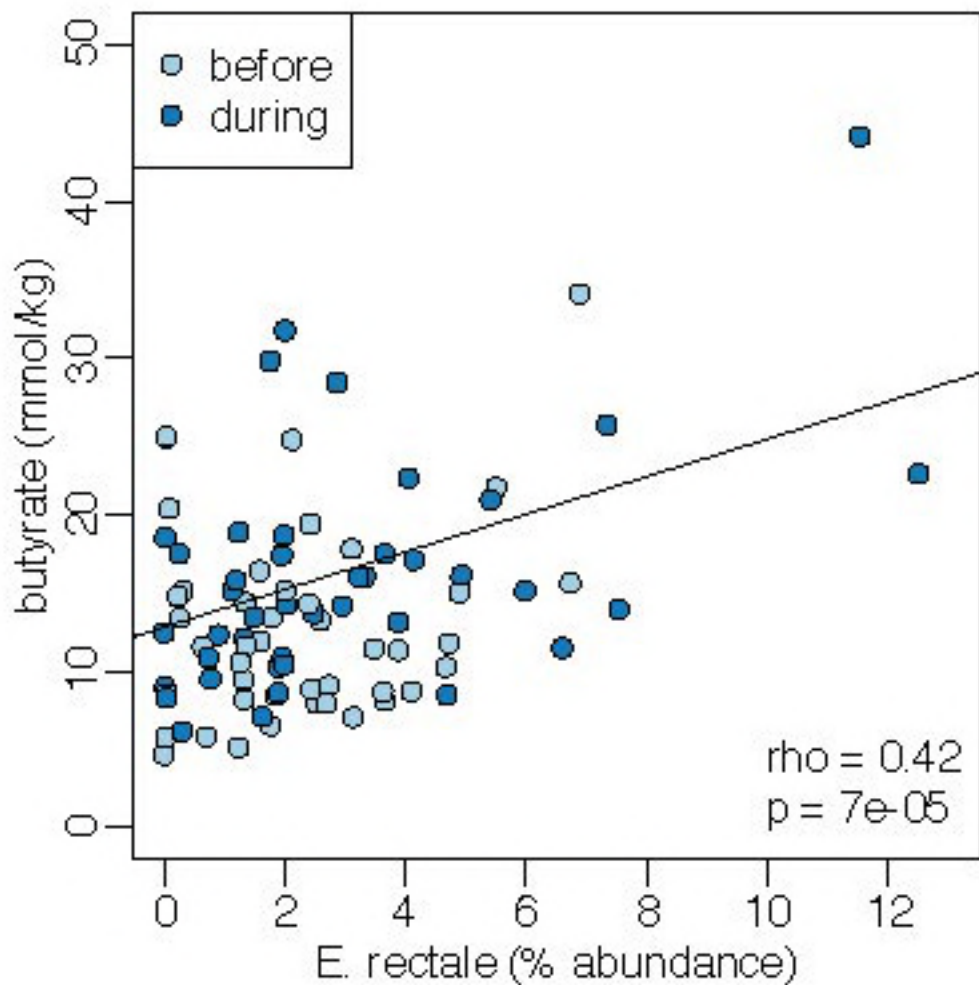

Source: https://www.biorxiv.org/content/10.1101/487900v1.full.pdf
